# Supplementary material
Source: Copernicus journal article supplement (doi:10.5194/egusphere-2026-2541)
Supplement: Supplementary file 1 [file egusphere-2026-2541-supplement.pdf]

*Supplement of*

**Validation of the surface velocity field of mountain glaciers from ITS\_LIVE V2.0 with in-situ GNSS data**

Jing Zhang et al.

Correspondence to: Yang Lei ([leiyang@nssc.ac.cn](mailto:leiyang@nssc.ac.cn))

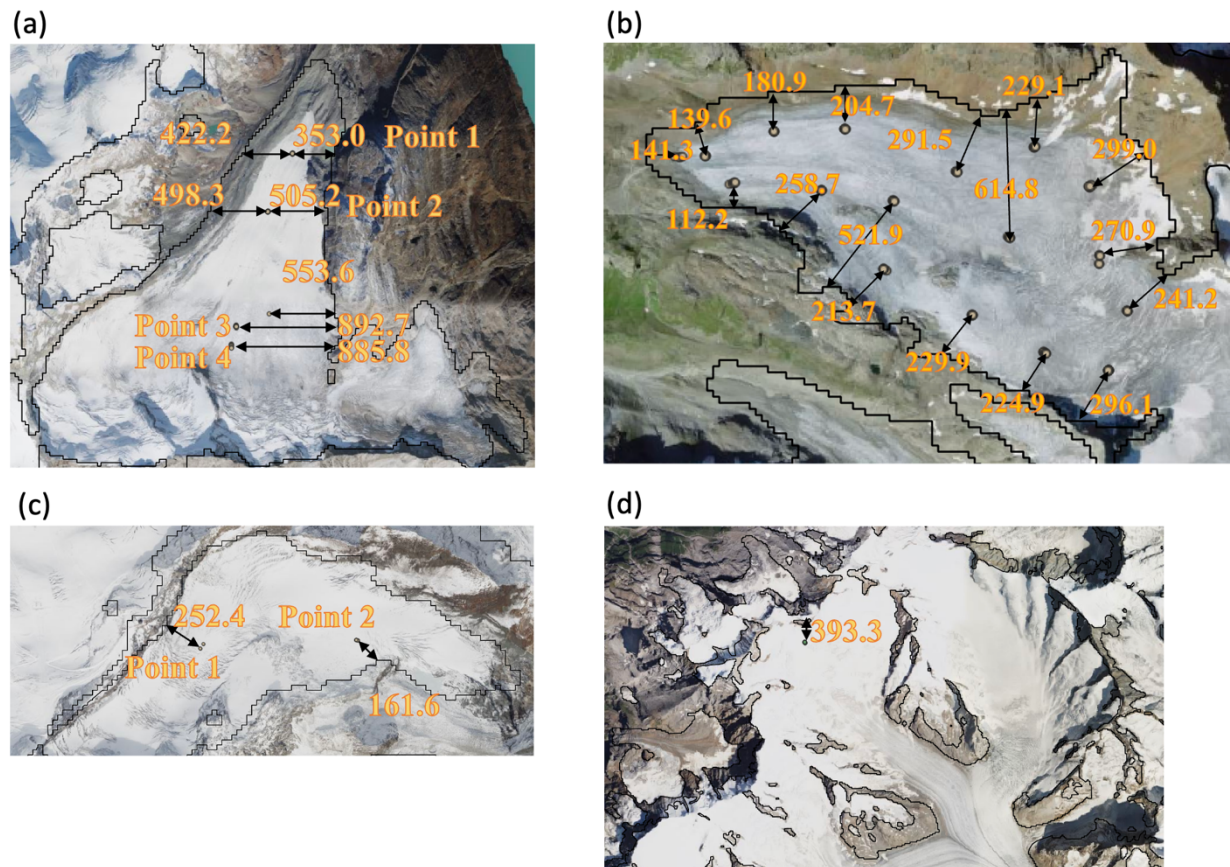

Figure S1: The GNSS site with the distance to the nearest rock in Switzerland. (a) Schwarzberggletscher; (b) Silvrettagletscher; (c) Hohlaubgletscher; (d) Grosser Aletschgletscher.

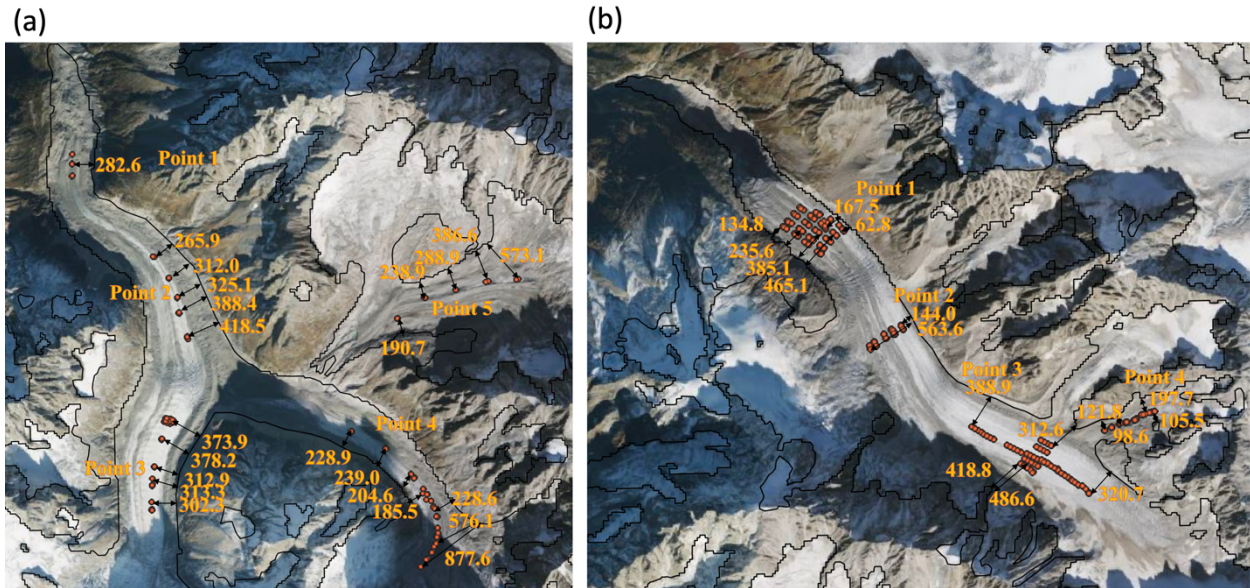

Figure S2: The GNSS site with the distance to the nearest rock in France. (a) Mer de Glace; (b) Argentière Glacier

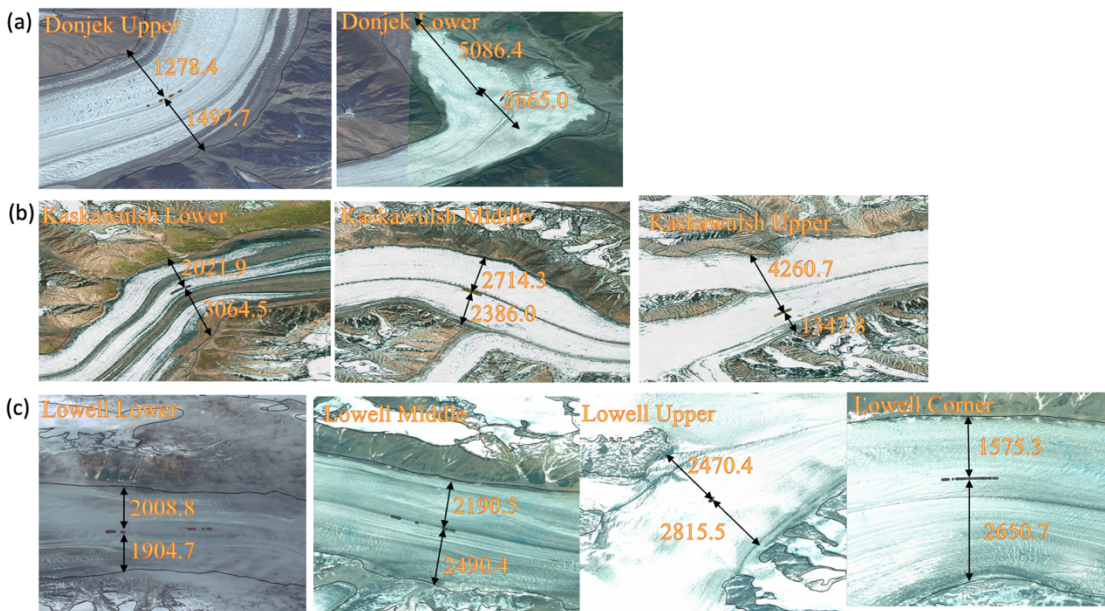

Figure S3: The GNSS site with the distance to the nearest rock in Yukon region. (a) Donjek glacier; (b) Kaskawulsh glacier; (c) Lowell glacier.

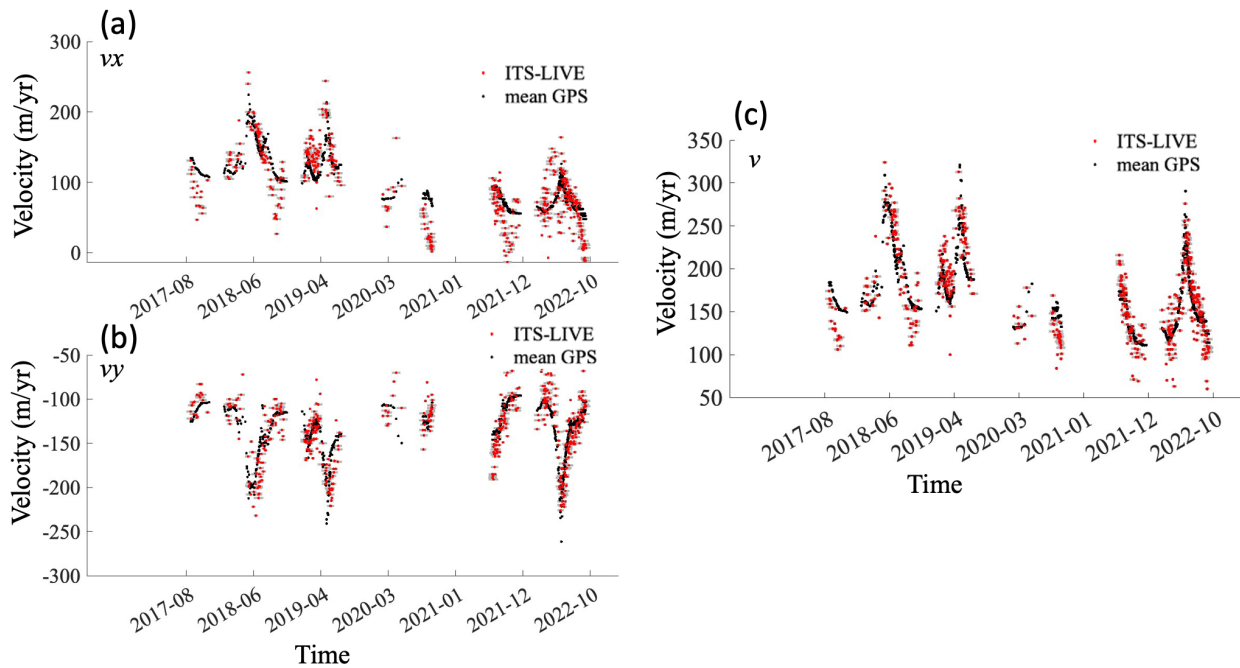

Figure S4. ITS\_LIVE V2 annual velocity time series (red line) at the Kaskawulsh Glacier lower monitoring point, showing seasonal velocity variations. Black dots denote in-situ GNSS measurements. Gray bars represent ITS\_LIVE V2 image-pair acquisition periods.

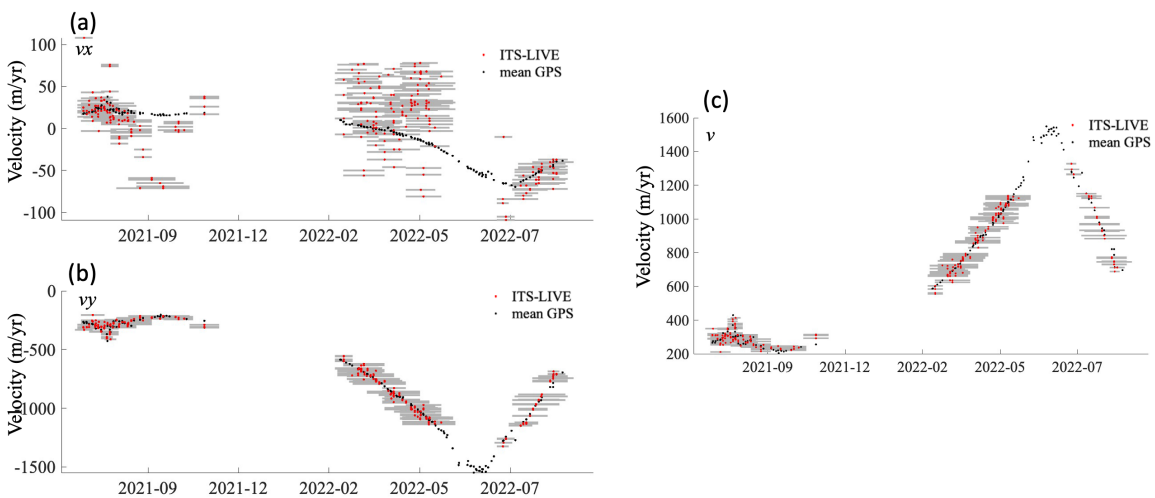

Figure S5. ITS\_LIVE V2 annual velocity time series (red line) at the Lowell Glacier corner monitoring point, illustrating the velocity signature of a surge-type glacier. In-situ GNSS measurements are shown as black dots. Gray horizontal bars indicate the image-pair acquisition periods used by ITS\_LIVE V2.

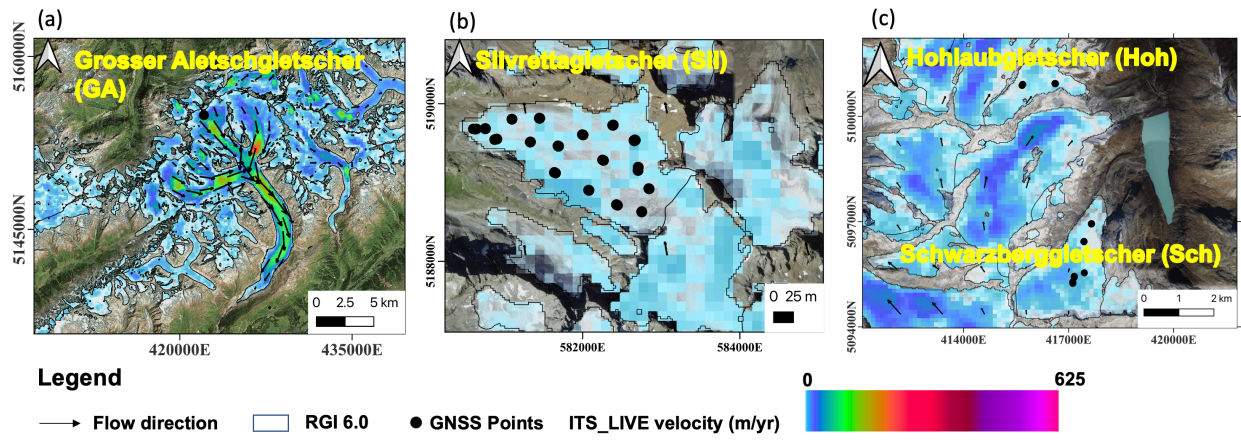

Figure S6. Location map of the study glaciers in Switzerland.
